# Supplementary material for: Simple Determination of Gold Nanocrystal Dimensions by Analytical Ultracentrifugation via Surface Ligand-Solvent Density Matching
Source: MDPI journal article supplement (doi:10.3390/nano11061427), 2021-05-28

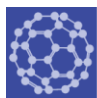

# Supplementary Materials

## Simple Determination of Gold Nanocrystal Dimensions by Analytical Ultracentrifugation via Surface Ligand-Solvent Density Matching

Guillermo González-Rubio \*, Holger Hilbert, Rose Rosenberg, Bing Ni, Lisa Fuhrer and Helmut Cölfen \*

Physical Chemistry Department of Chemistry, University of Konstanz, Universitätsstraße 10, Box 714, 78457 Konstanz, Germany; holger.hilbert@uni-konstanz.de (H.H.); rose.rosenberg@uni-konstanz.de (R.R.); bing.ni@uni-konstanz.de (B.N.); lisa.fuhrer@uni-konstanz.de (L.F.)

\* Correspondence: guillermo.gonzalez-rubio@uni-konstanz.de (G.G.-R.); helmut.coelfen@uni-konstanz.de (H.C.)

### 1. Derivation of the Svedberg Equation for NC@SL@SS

The interplay of three forces governs the sedimentation behaviour of a NC@SL@SS: i) the applied centrifugal force ( $F_{s,NC@SL@SS}$ ), ii) the buoyant force ( $F_{b,NC@SL@SS}$ ), and iii) the frictional force ( $F_{f,NC@SL@SS}$ ) (eqs. 7, 8 and 9 in the main text). Note that all eqs. follow the indexation given in the main text.

$$F_{f,NC@SL@SS} = -f_{NC@SL@SS} \cdot u \quad (7)$$

$$F_{s,NC@SL@SS} = \omega^2 \cdot r \cdot (m_{NC} + m_{SL} + m_{SS}) \quad (8)$$

$$F_{b,NC@SL@SS} = -\omega^2 \cdot r \cdot \rho \cdot \left( m_{NC} \cdot \frac{1}{\rho_{NC}} + m_{SL} \cdot \frac{1}{\rho_{SL}} + m_{SS} \cdot \frac{1}{\rho_{SS}} \right) \quad (9)$$

During the sedimentation experiment, a balance between the three forces is reached (eq. 10 in the main text):

$$F_{s,NC@SL@SS} + F_{b,NC@SL@SS} = F_{f,NC@SL@SS} \quad (10)$$

and by insertion of (4), (7), (8), and (9) in (10):

$$\begin{aligned} & \omega^2 \cdot r \cdot (m_{NC} + m_{SL} + m_{SS}) - \omega^2 \cdot r \cdot \rho \cdot \left( m_{NC} \cdot \frac{1}{\rho_{NC}} + m_{SL} \cdot \frac{1}{\rho_{SL}} + m_{SS} \cdot \frac{1}{\rho_{SS}} \right) \\ &= \frac{kT}{D_{NC@SL@SS}} \cdot u \end{aligned} \quad (S1)$$

$$\omega^2 \cdot r \cdot \left[ (m_{NC} + m_{SL} + m_{SS}) - \rho \left( m_{NC} \cdot \frac{1}{\rho_{NC}} + m_{SL} \cdot \frac{1}{\rho_{SL}} + m_{SS} \cdot \frac{1}{\rho_{SS}} \right) \right] = \frac{kT}{D_{NC@SL@SS}} \cdot u \quad (S2)$$

$$\frac{D_{NC@SL@SS} \left[ (m_{NC} + m_{SL} + m_{SS}) - \rho \left( m_{NC} \cdot \frac{1}{\rho_{NC}} + m_{SL} \cdot \frac{1}{\rho_L} + m_{SS} \cdot \frac{1}{\rho_S} \right) \right]}{kT} = \frac{u}{\omega^2 \cdot r} \quad (S3)$$

Where  $u/\omega^2 r$  is the sedimentation coefficient of the NC@SL@SS,  $s_{NC@SL@SS}$

$$s_{NC@SL@SS} = \frac{D_{NC@SL@SS} \left[ (m_{NC} + m_{SL} + m_S) - \rho \left( m_{NC} \cdot \frac{1}{\rho_{NC}} + m_L \cdot \frac{1}{\rho_L} + m_S \cdot \frac{1}{\rho_S} \right) \right]}{kT} \quad (S4)$$

$$s_{NC@SL@SS} = \frac{D_{NC@SL@SS} \left[ m_{NC} \cdot \left( 1 - \frac{\rho}{\rho_{NC}} \right) + m_{SL} \cdot \left( 1 - \frac{\rho}{\rho_{SL}} \right) + m_{SS} \cdot \left( 1 - \frac{\rho}{\rho_{SS}} \right) \right]}{kT} \quad (S5)$$

Where  $k=R/N_A$  ( $N_A$  = Avogadro's constant), and thus, we arrive at the final form of the Svedberg equation for NC@SL@SS (11)

$$s_{NC@SL@SS} = \frac{D_{NC@SL@SS} \cdot N_A \left[ m_{NC} \cdot \left( 1 - \frac{\rho}{\rho_{NC}} \right) + m_{SL} \cdot \left( 1 - \frac{\rho}{\rho_{SL}} \right) + m_{SS} \cdot \left( 1 - \frac{\rho}{\rho_{SS}} \right) \right]}{R \cdot T} \quad (11)$$

And since  $M = m N_A$

$$s_{NC@SL@SS} = \frac{D_{NC@SL@SS} \cdot \left[ M_{NC} \cdot \left( 1 - \frac{\rho}{\rho_{NC}} \right) + M_{SL} \cdot \left( 1 - \frac{\rho}{\rho_{SL}} \right) + M_{SS} \cdot \left( 1 - \frac{\rho}{\rho_{SS}} \right) \right]}{R \cdot T} \quad (S6)$$

Or

$$\left[ M_{NC} \cdot (1 - \bar{v}_{NC} \rho) + M_L \cdot (1 - \bar{v}_{SL} \rho) + M_S \cdot (1 - \bar{v}_{SS} \rho) \right] = \frac{s_{NC@SL@SS} \cdot R T}{D_{NC@SL@SS}} \quad (S7)$$

## 2. 3D Plot of Sedimentation Coefficient and $(f/f_c)_{\text{AuNC@CTAB@W}}$ (lower) Distributions Obtained at Different Wavelengths.

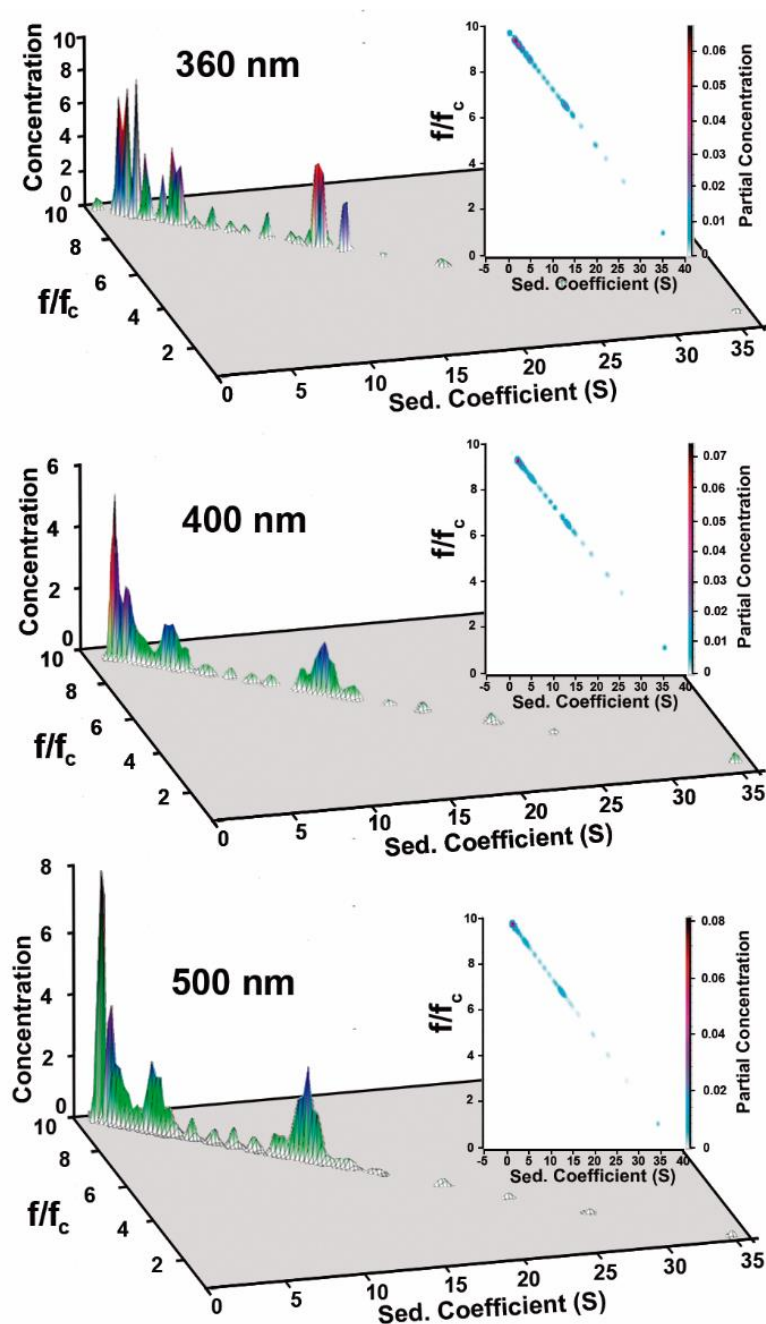

**Figure S1.** 3D and 2D (inset) plots of sedimentation coefficient and  $(f/f_c)_{\text{AuNC@CTAB@W}}$  (lower) distributions obtained from sedimentation velocity AUC measurements at 360, 400 and 500 nm (using the density of Au to perform the analysis).

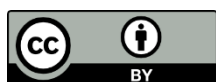

Supplement: s1 [file s1]
